# Supplementary material for: Facile cascade-anchored synthesis of ultrahigh metal loading single-atom for significantly improved Fenton-like catalysis
Source: Research Square preprint supplement (doi:10.21203/rs.3.rs-5395627/v1), 2024-12-18
Supplement: Supplementary file 1 [file 5f37a5cd0b5fa519310f58db.pdf]

**Facile cascade-anchored synthesis of ultrahigh metal loading single-atom for  
significantly improved Fenton-like catalysis**

Shuaishuai Li, Wei Wang \*, Huizhong Wu, Xuechun Wang, shihu Ding, Jingyang Liu,  
Xiuwu Zhang, Jiangli Sun, Chunhong Fu, Minghua Zhou \*

*MOE Key Laboratory of Pollution Processes and Environmental Criteria,*

*Tianjin Key Laboratory of Environmental Technology for Complex Trans-Media Pollution,*

*Tianjin Advanced Water Treatment Technology International Joint Research Center,*

*College of Environmental Science and Engineering, Nankai University, Tianjin 300350, China*

*Carbon Neutrality Interdisciplinary Science Centre, College of Environmental Science and*

*Engineering, Nankai University, Tianjin 300350, China*

---

\* Corresponding author. Tel/Fax: +86 022 23501117. E-mail address: zhousmh@nankai.edu.cn (M. Zhou),  
nkwangwei@126.com

**This file includes:**

**1. Supplementary Notes 1-4**

**Note 1.** Chemicals and Materials

**Note 2.** Characterization methods

**Note 3.** Electrochemical measurements

**Note 4.** Quantum chemical calculations

**2. Supplementary Figures 1-29**

**Fig. 1** | HRTEM images of Fe-SAC-41.31.

**Fig. 2** | Raman spectra of as prepared catalysts with different Fe loading.

**Fig. 3** | TEM images of Fe-SAC precursor obtained by the a, conventional solvent evaporation method; b, the cascade anchoring strategy.

**Fig. 4** | High-resolution XPS spectrum of Fe 2p.

**Fig. 5** | High-resolution XPS spectrum of N 1s.

**Fig. 6** | The binding energies of the possible CN coordination modes.

**Fig. 7** | The structure model of Fe-SAC-5.16.

**Fig. 8** | The structure model of Fe-SAC-15.82.

**Fig. 9** | The structure model of Fe-SAC-24.62.

**Fig. 10** | The structure model of Fe-SAC-41.31.

**Fig. 11** | Projected density of state (pDOS) of Fe 3d, N 2p, and C 2p orbital.

**Fig. 12** | Top and side views of differential charge density of Fe-SAC-x models.

**Fig. 13** | XRD patterns of as-prepared Mn-SAC, La-SAC and Ag-SAC.

**Fig. 14** | HAADF-STEM images of a, Mn-SAC; b, La-SAC and c, Ag-SAC.

**Fig. 15** | Degradation effect of PMS on SMX.

**Fig. 16** | The degradation kinetics of SMX in Fe-SAC-x/PMS system.

**Fig. 17** | Iron dissolution of Fe-SAC-x during degradation.

**Fig. 18** | a, SMX degradation performance. b, SMX degradation kinetics in the Fe-SAC-41.31/PMS and Fe-SAC-T/PMS system, respectively. Experimental conditions:  $[\text{SMX}]_0 = 10 \text{ mg L}^{-1}$ ,  $[\text{PMS}]_0 = 2 \text{ mM}$ ,  $\text{pH} = 7$ , catalyst:  $0.1 \text{ g}$

**Fig. 19** | Degradation performance of SMX at different initial concentrations in the a, Fe-SAC-41.31/PMS system b, Fe-SAC-T/PMS system, respectively. Experimental conditions:  $[\text{PMS}]_0 = 2 \text{ mM}$ ,  $\text{pH} = 7$ , catalyst:  $0.1 \text{ g L}^{-1}$ .

**Fig. 20** | Effect of ionic strength on SMX removal in Fe-SAC-41.31/PMS system.

**Fig. 21** | Open-circuit potential change of Fe-SAC-41.31 with the addition of SMX.

**Fig. 22** | EPR spectra of  $\cdot\text{OH}$  or  $\text{SO}_4^{\cdot-}$  in the Fe-SAC-41.31/PMS system.

**Fig. 23** | Degradation performance of SMX with continuous injection of  $\text{N}_2$  into the Fe-SAC-41.31/PMS system at a rate of  $40 \text{ mL min}^{-1}$ .

**Fig. 24** | EPR spectra of  $\text{O}_2^{\cdot-}$  in the Fe-SAC-41.31/PMS system.

**Fig. 25** | Concentration changes of PMSO and PMSO<sub>2</sub> over reaction time. Reaction conditions:  $[\text{PMSO}]_0 = 10 \text{ mg L}^{-1}$ ,  $[\text{PMS}] = 2.0 \text{ mM}$ .

**Fig. 26** | SMX degradation pathways in the Fe-SAC-41.31/PMS system.

**Fig. 27** | Two possible oxygen adsorption configurations of Fe-C<sub>2</sub>N<sub>2</sub> for PMS.

**Fig. 28** | a, b, TEM image of Fe-SAC-41.31 before and after the catalytic reaction.

**Fig. 29** | a, Design principle of continuous flow device; b, Physical diagram of continuous flow device.

### **3. Supplementary Tables 1-13**

**Table 1** | Fe content in varying samples.

**Table 2** | BET surface area, pore diameter and mesoporous pore volume of as-prepared catalysts.

**Table 3** | EXAFS fitting parameters for various Fe-SAC-x samples.

**Table 4** | Element contents and Fe density derived from XPS results.

**Table 5** | Catalytic oxidation performances of various catalysts for pollutants.

**Table 6** | Intermediates detected by LC-MS in the Fe-SAC-41.31/PMS system.

**Table 7** | The adsorption energy and bond length of Fe-O, O-O and O-H in the possible two adsorption configurations.

**Table 8** | The Gibbs free-energy ( $\Delta E$ ) for every step in the two possible pathways of Fe-SAC-41.31 system.

**Table 9** | The Gibbs free-energy ( $\Delta E$ ) for every step in the possible pathway of different catalysts.

**Table 10** | The quality parameters of the wastewater.

**Table 11** | The quality parameters of the coal reverse osmosis water.

**Table 12** | 3DEEM response and their associated characteristics.

**Table 13** | The HPLC analysis conditions for different substrates.

### **4. Supplementary References**

## 1. Supplementary Notes

### Chemicals and Materials

Iron nitrate nonahydrate ( $\text{Fe}(\text{NO}_3)_3 \cdot 9\text{H}_2\text{O}$ ) and melamine ( $\text{C}_3\text{H}_6\text{N}_6$ , 99%) were bought from Macklin Ltd. (Shanghai, China). Sodium sulfate ( $\text{Na}_2\text{SO}_4$ ), potassium peroxymonosulfate (PMS,  $\text{KHSO}_5 \cdot 0.5\text{KHSO}_4 \cdot 0.5\text{K}_2\text{SO}_4$ ), sodium bicarbonate ( $\text{NaHCO}_3$ ), sodium dihydrogen phosphate ( $\text{NaH}_2\text{PO}_4$ ), sulfuric acid ( $\text{H}_2\text{SO}_4$ ), sodium hydroxide ( $\text{NaOH}$ ), potassium thiocyanate ( $\text{KSCN}$ ), 5,5-dimethyl-1-pyrroline N-oxide (DMPO, 97%), methyl phenyl sulfoxide (PMSO) and Furfuryl alcohol (FFA) were purchased from Aladdin Ltd. (Shanghai, China). Methanol ( $\text{MeOH}$ , 99.9%) was purchased from Tianjin Kemiou Chemical Reagent Co., Ltd (Tianjin, China). Tertbutyl alcohol (TBA, > 99.5%), Nafion solution (5 wt.%) and oxalic acid (OA) were purchased from Sinopharm Group Chemical Reagent Co., Ltd. (Shanghai, China). 2,2,6,6-Tetramethylpiperidine (TEMP) was bought from Tianjin Sinos Opto Technology Co., Ltd (Tianjin, China). The studied model pollutants, bisphenol A (BPA), phenol (BP), Rhodamine B (RhB), tetracycline (TC), methyl orange (MO) and sulfamethoxazole (SMX) were purchased from Aladdin Ltd. (Shanghai, China). All organic solvents were HPLC grade.

## **Characterization methods**

XAS measurements were carried out in transmission mode using a commercial laboratory device (easyXAFS300, easy XAFS LLC, Renton, WA). This instrument is based on Rowland circle geometries and is equipped with spherically bent crystal analyzers (SBCAs) and a silicon drift detector (AXAS-M1, KETEK GmbH, Munich, Germany). The morphologies of catalysts were observed by the transmission electron microscopy (TEM, JEM-2800). Aberration-corrected high-angle annular dark-field scanning transmission electron microscopy (AC-HAADF-STEM) images were recorded on a high resolution transmission electron microscope (JEM-ARM200F) with a field-emission gun at 200 kV. X-ray photoelectron spectroscopy (XPS, Thermo Scientific ESCALAB 250Xi) was utilized to analyze the bonding state of elements on the catalyst surface. Fourier transformed infrared spectroscopy (FTIR) was conducted by Thermo Scientific Nicolet IS50 FTIR (Thermo Fisher, USA). In-situ FTIR was carried out using an external reflection configuration and the Ge crystal was used as prism. Raman analysis was carried out using a confocal microscopic Raman spectrometer (LabRam HR, Horiba, France). X-ray diffraction (XRD) patterns of catalysts were characterized by a Philips-12045 B/3 diffractometer. BET specific surface areas and pore distribution of the catalysts were measured through a Micromeritics ASAP 2460 instrument. The atomic ratios of Fe in the samples were analyzed using an inductively coupled plasma atomic emission spectrometer (ICP- AES) (IRIS Intrepid II XSP) to reveal the catalyst composition. Electron paramagnetic resonance (EPR) was used to analyze the reactive species by a Bruker EMX Nano (Germany).

## Electrochemical measurements

The electrochemical performance was tested by a CHI 760E potentiostat (CH Instruments, Chenhua, Shanghai, China). The catalyst was coated on a glassy carbon electrode as a working electrode (5 mg of catalyst, 50  $\mu$ L of Nafion and 1 mL of ethanol were mixed by ultrasonication, and 10  $\mu$ L of the mixture was dropped onto the glassy carbon electrode to dry naturally, the catalyst loading was 0.25 mg cm<sup>-2</sup>), a platinum sheet was used as the counter electrode, and Ag/AgCl electrode was used as the reference electrode. The electrode potential was converted to a reversible hydrogen electrode (RHE) reference scale using  $E_{RHE}=E_{Ag/AgCl}+0.197+0.0592(\text{pH})$ . The linear sweep voltammetry (LSV) curve was obtained at the scanning rate of 10 mV s<sup>-1</sup> in the electrolyte of Na<sub>2</sub>SO<sub>4</sub> (50 mM, pH 7). Chronopotentiometry and chronoamperometry analyses were performed to obtain the surface oxidation potential and current response in the reaction system. PMS and SMX samples were added into the electrolyte at stated intervals, with final concentrations of 2 mM and 10 mg L<sup>-1</sup>, respectively.

## Quantum chemical calculations

All spin-polarized density-functional theory (DFT) was calculated through projective enhanced wave method in the Vienna ab initio simulation package (VASP) based on the plane wave base set <sup>1,2</sup>. Generalized gradient approximation (GGA) and PBE parameterization were used to deal with the exchange correlation potential <sup>3</sup>. Grimme's DFT-D3 model was applied for Van der Waals correction (6). To avoid interaction between adjacent images, a vacuum area of about 18 Å was used. The energy cutoff was set at 450 eV. The Brillouin-zone integrals were sampled using a  $\Gamma$ -centered Monkhorst-Pack lattice ( $2 \times 2 \times 1$ ). The structure was completely relaxed until the maximum force on each atom was less than 0.02 eV/Å, with an energy convergence criterion of  $10^{-5}$  eV. The free energies (G) of different intermediates are defined as  $G = E_i - E_{\text{reactant}}$  ( $E_i$  is the energy of intermediates and  $E_{\text{reactant}}$  is the total energy of reactants) and finally obtained by  $G = E_{\text{total}} + E_{\text{ZPE}} - TS$ , where  $E_{\text{total}}$ ,  $E_{\text{ZPE}}$ , and TS are the ground-state energy, zero-point energies, and entropy terms, respectively, with the latter two taking vibration frequencies from DFT.



## 2. Supplementary Figures 1-29

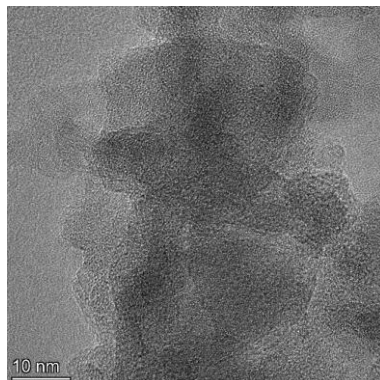

**Supplementary Fig. 1** | HRTEM images of Fe-SAC-41.31.

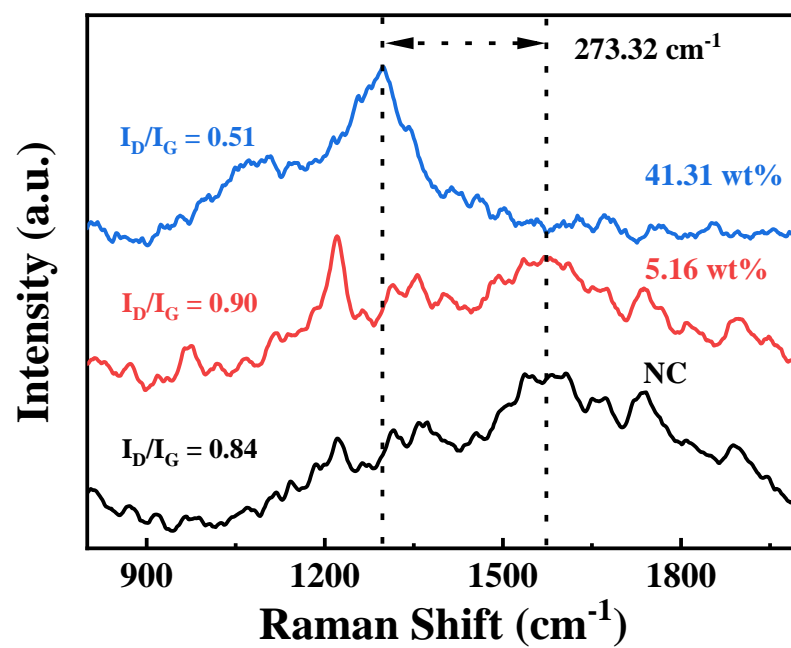

**Supplementary Fig. 2** | Raman spectra of as prepared catalysts with different Fe loading.

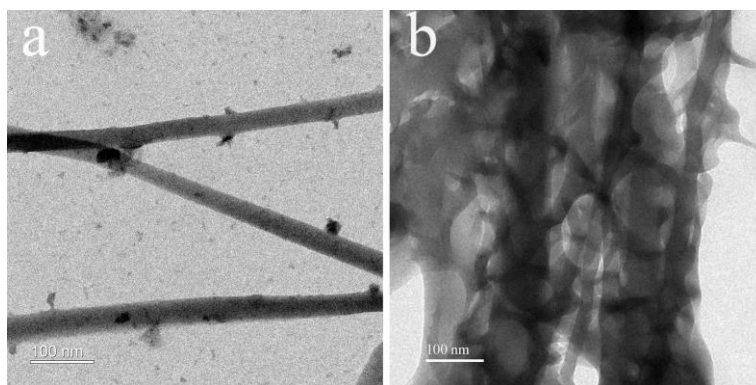

**Supplementary Fig. 3** | TEM images of Fe-SAC precursor obtained by the **a**, conventional solvent evaporation method; **b**, the cascade anchoring strategy.

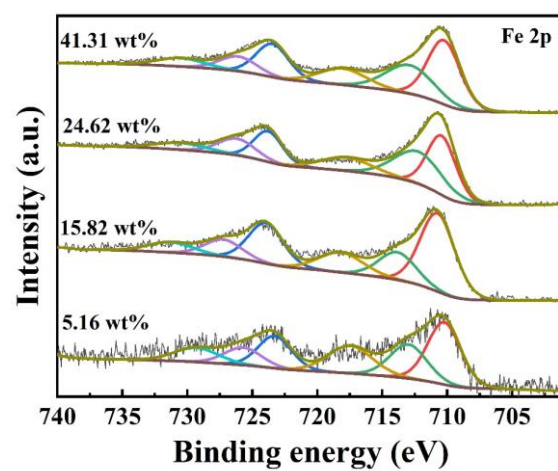

**Supplementary Fig. 4** | High-resolution XPS spectrum of Fe 2p.

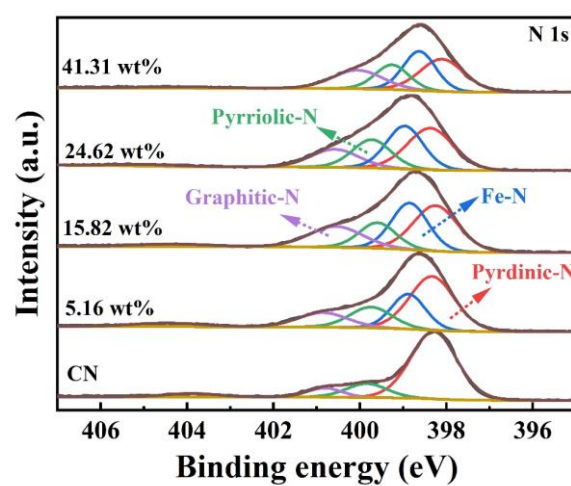

**Supplementary Fig. 5** | High-resolution XPS spectrum of N 1s.

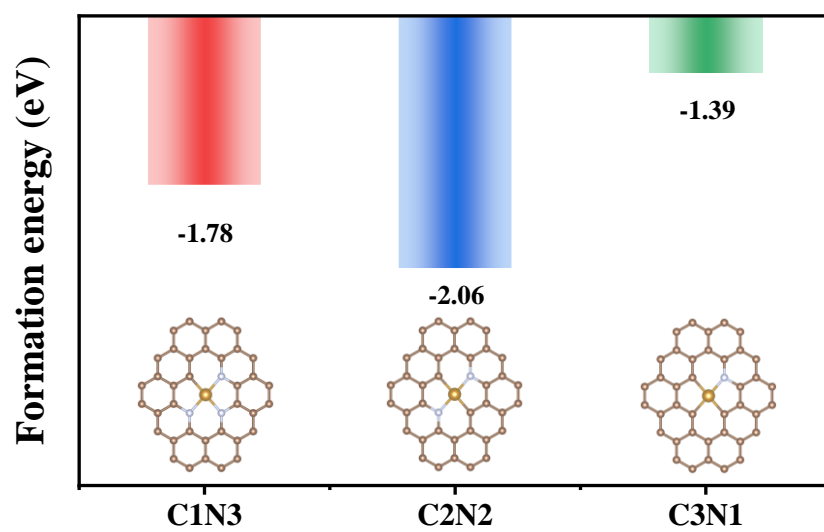

**Supplementary Fig. 6** | The binding energies of the possible CN coordination modes.

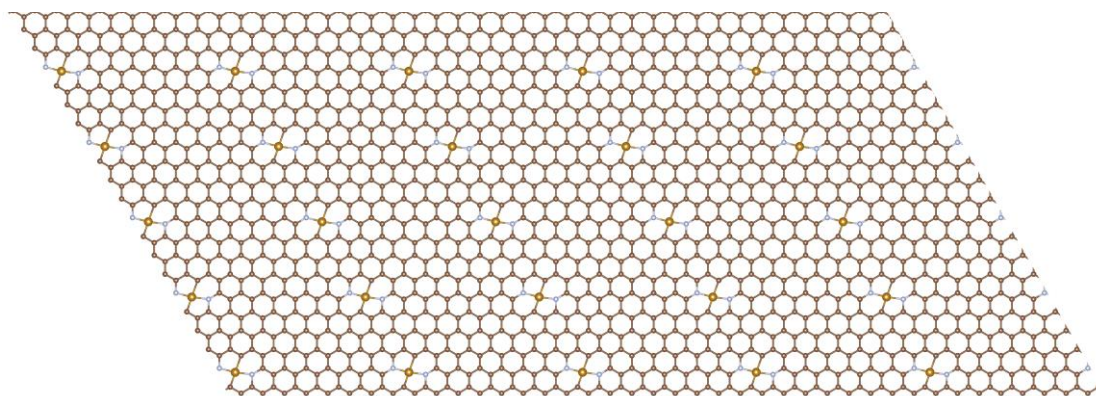

**Supplementary Fig. 7** | The structure model of Fe-SAC-5.16.

Sample: Fe-SAC-5.16

Number of atoms: 25 Fe, 50 N, 1561 C

Theoretical Fe loading:  $\text{Fe}(\text{wt}\%) = \frac{25 \times 56}{25 \times 56 + 50 \times 14 + 1561 \times 12} = 6.72 \text{ wt}\%$

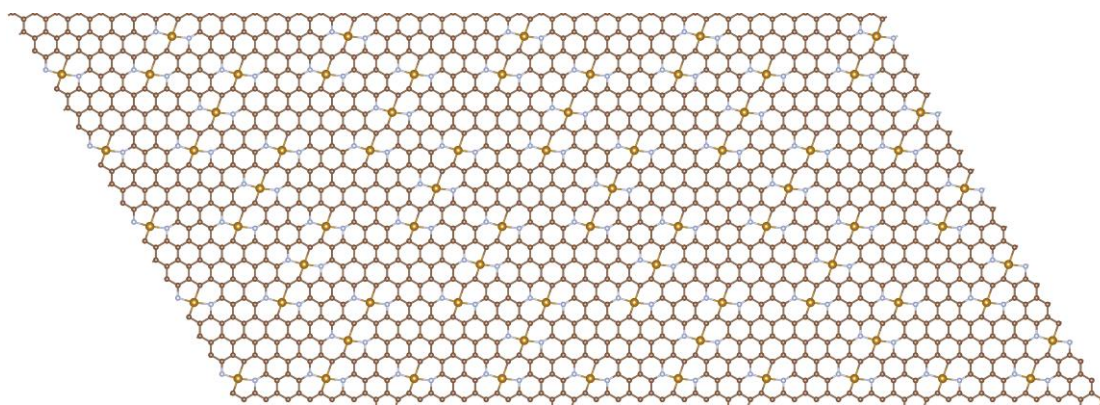

**Supplementary Fig. 8** | The structure model of Fe-SAC-15.82.

Sample: Fe-SAC-15.82

Number of atoms: 75 Fe, 150 N, 1361 C

Theoretical Fe loading:  $\text{Fe}(\text{wt}\%) = \frac{75 \times 56}{75 \times 56 + 75 \times 14 + 1361 \times 12} = 19.46\text{wt}\%$



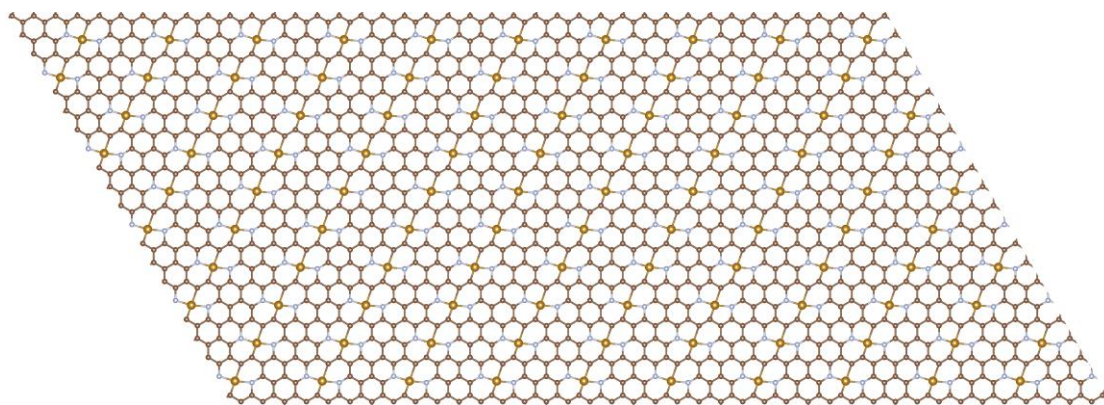

**Supplementary Fig. 9** | The structure model of Fe-SAC-24.62.

Sample: Fe-SAC-24.62

Number of atoms: 100 Fe, 200 N, 1261 C

Theoretical Fe loading:  $\text{Fe}(\text{wt}\%) = \frac{100 \times 56}{100 \times 56 + 200 \times 14 + 1261 \times 12} = 24.79\text{wt}\%$

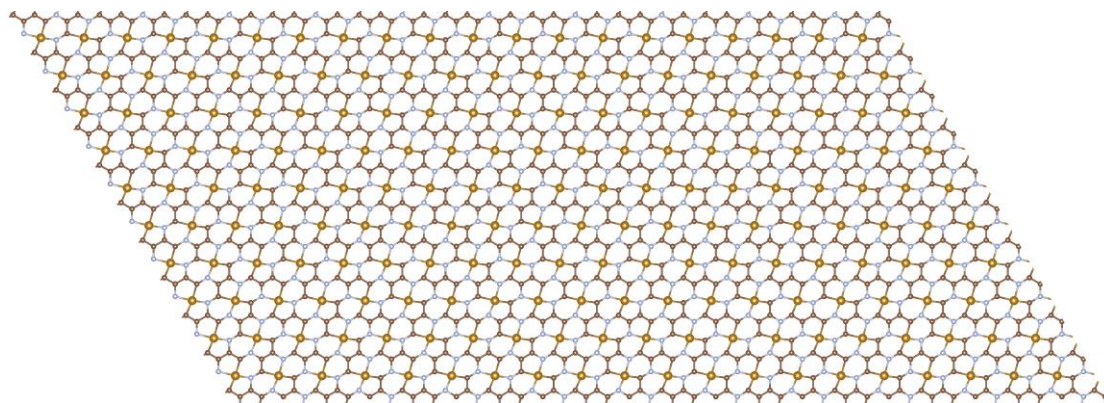

**Supplementary Fig. 10** | The structure model of Fe-SAC-41.31.

Sample: Fe-SAC-41.31

Number of atoms: 200 Fe, 400 N, 861 C

Theoretical Fe loading:  $\text{Fe}(\text{wt}\%) = \frac{200 \times 56}{200 \times 56 + 400 \times 14 + 861 \times 12} = 41.28\text{wt}\%$

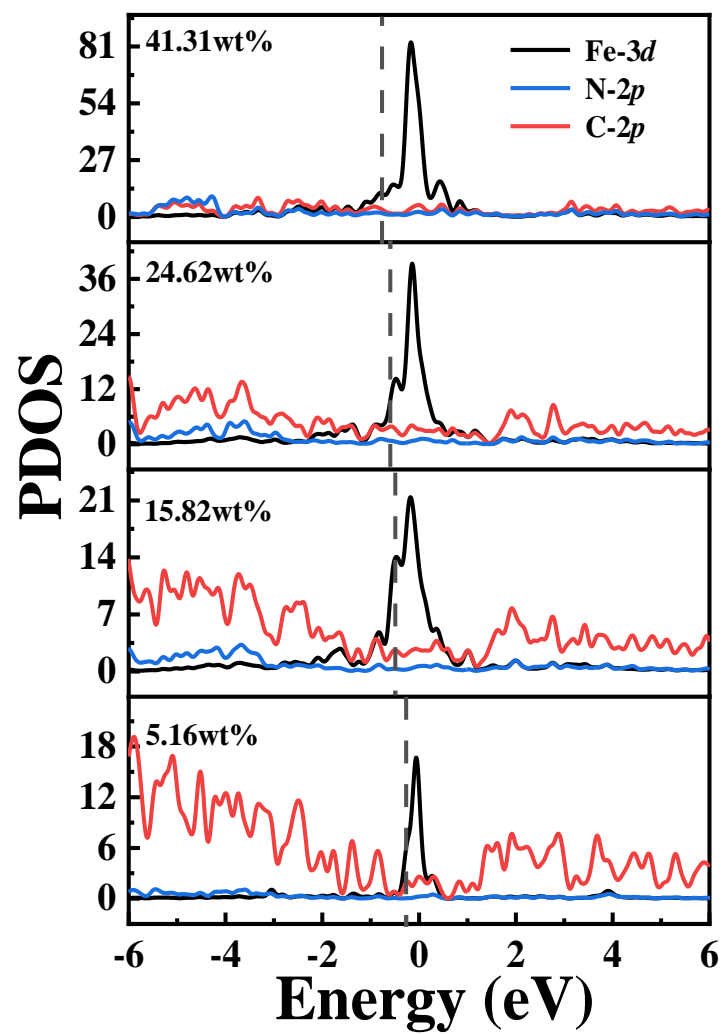

**Supplementary Fig. 11** | Projected density of state (pDOS) of Fe 3d, N 2p, and C 2p orbital.

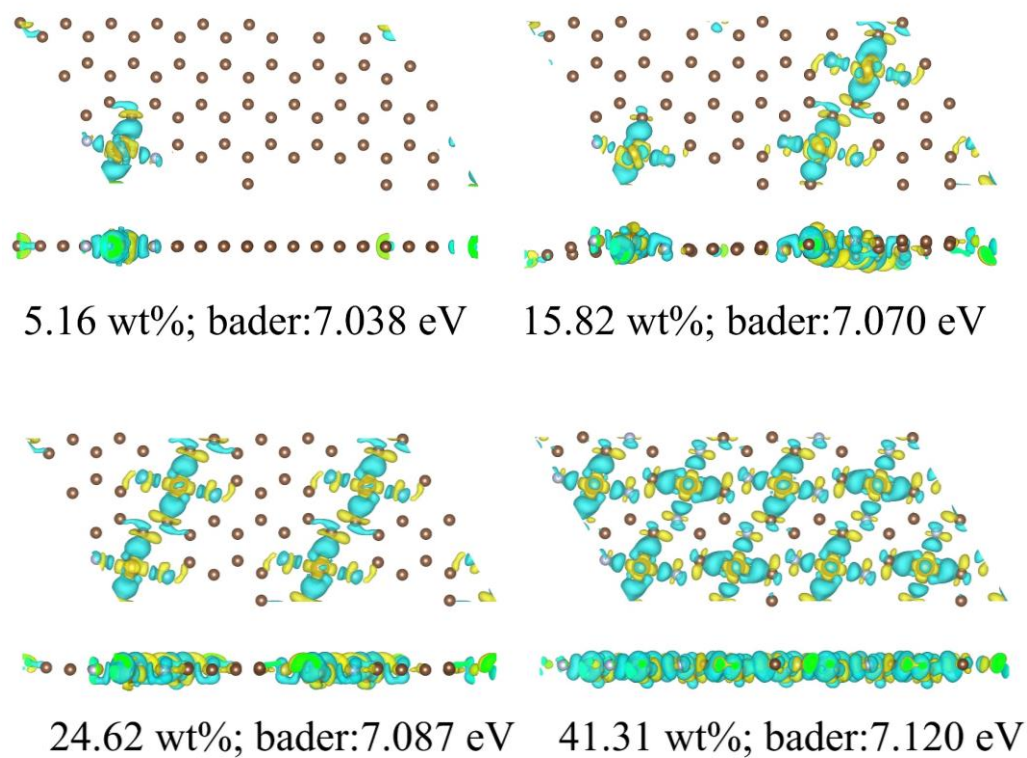

**Supplementary Fig. 12** | Top and side views of differential charge density of Fe–SAC-x models.

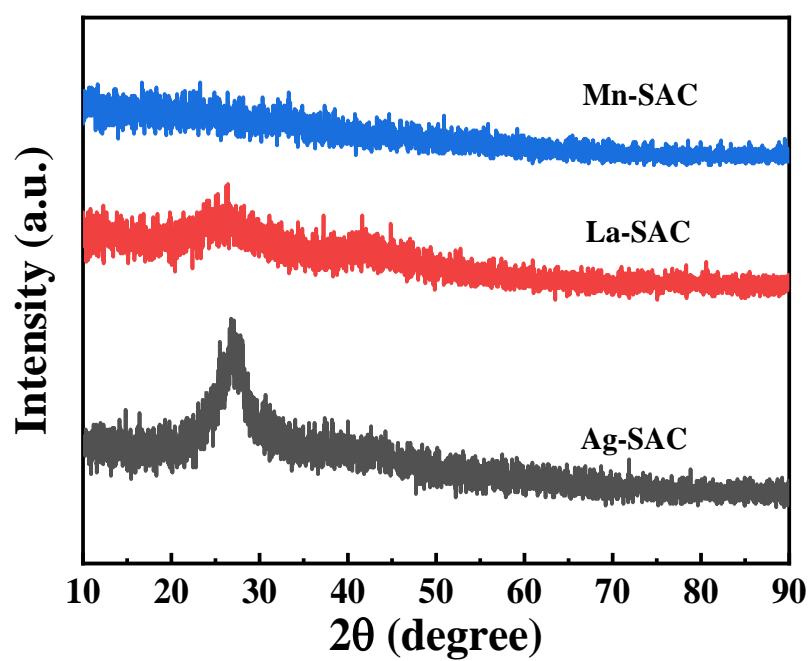

**Supplementary Fig. 13** | XRD patterns of as-prepared Mn-SAC, La-SAC and Ag-SAC.

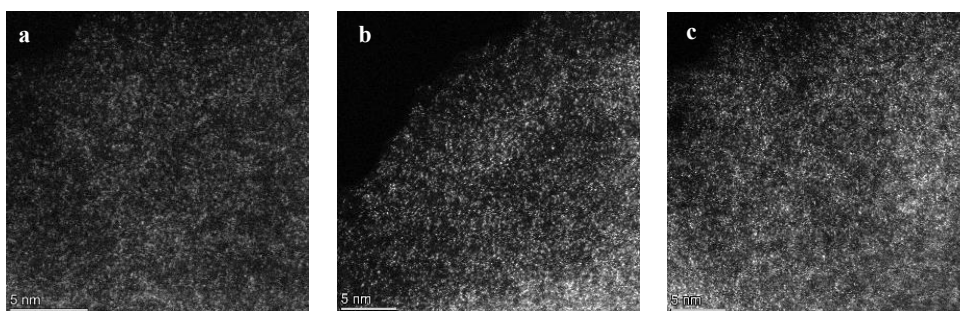

**Supplementary Fig. 14** | HAADF-STEM images of **a**, Mn-SAC; **b**, La-SAC and **c**, Ag-SAC.

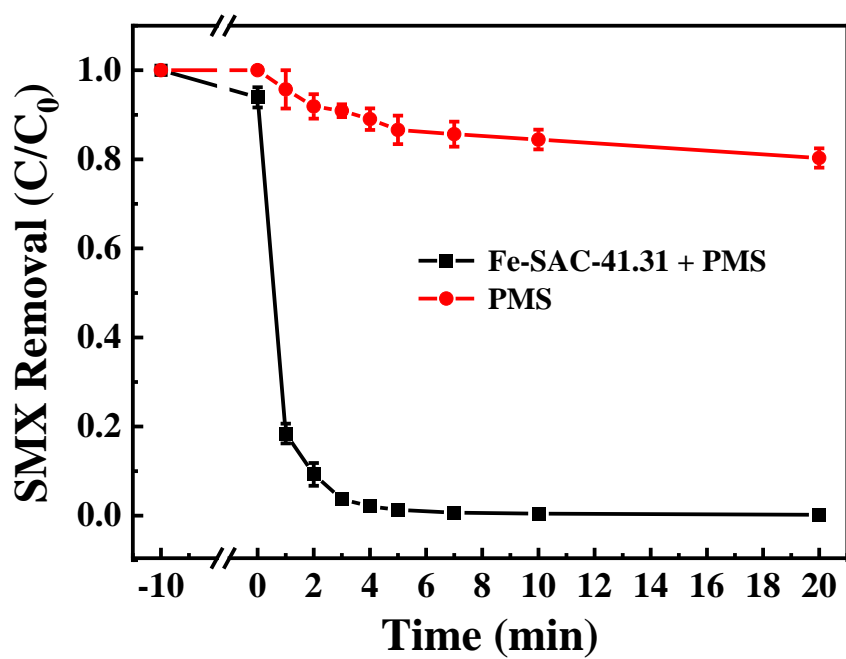

Supplementary Fig. 15 | Degradation effect of PMS on SMX.

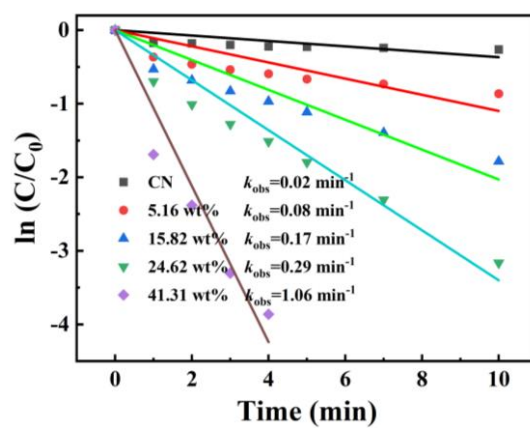

**Supplementary Fig. 16** | The degradation kinetics of SMX in Fe-SAC-x/PMS system.



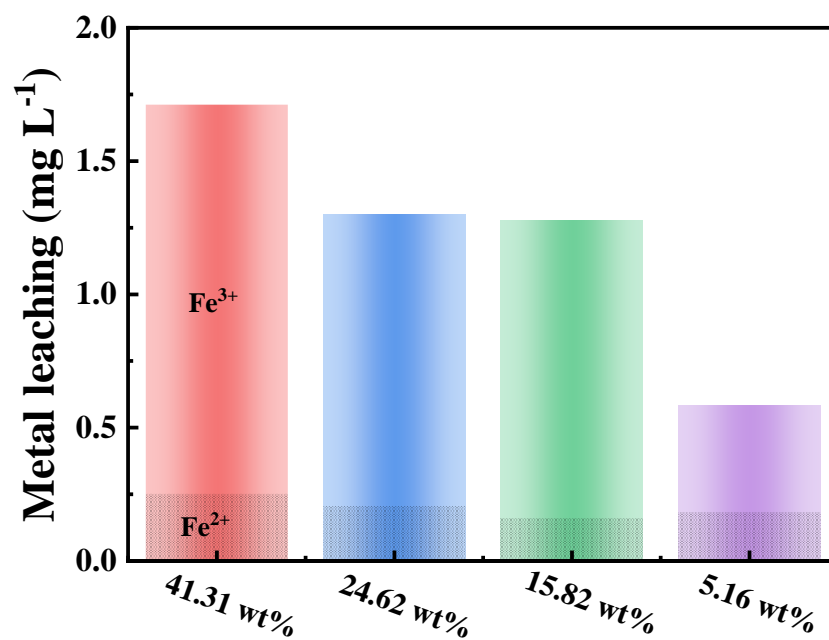

**Supplementary Fig. 17** | Iron dissolution of Fe-SAC-x during degradation.

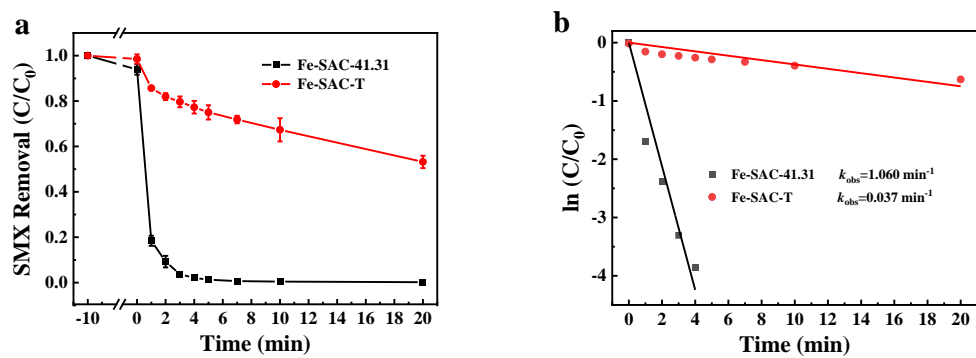

**Supplementary Fig. 18 | a**, SMX degradation performance. **b**, SMX degradation kinetics in the Fe-SAC-41.31/PMS and Fe-SAC-T/PMS system, respectively. Experimental conditions:  $[SMX]_0 = 10 \text{ mg L}^{-1}$ ,  $[PMS]_0 = 2 \text{ mM}$ ,  $\text{pH} = 7$ , catalyst:  $0.1 \text{ g L}^{-1}$ .

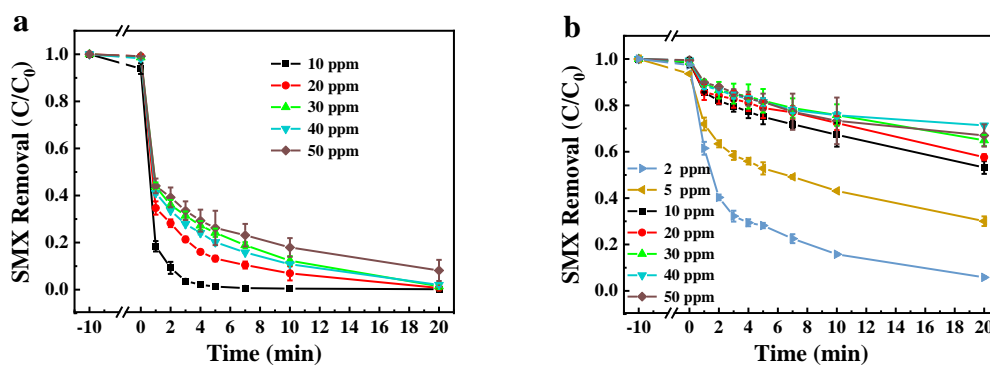

**Supplementary Fig. 19** | Degradation performance of SMX at different initial concentrations in the **a**, Fe-SAC-41.31/PMS system **b**, Fe-SAC-T/PMS system, respectively. Experimental conditions:  $[PMS]_0 = 2 \text{ mM}$ ,  $\text{pH} = 7$ , catalyst:  $0.1 \text{ g L}^{-1}$ .

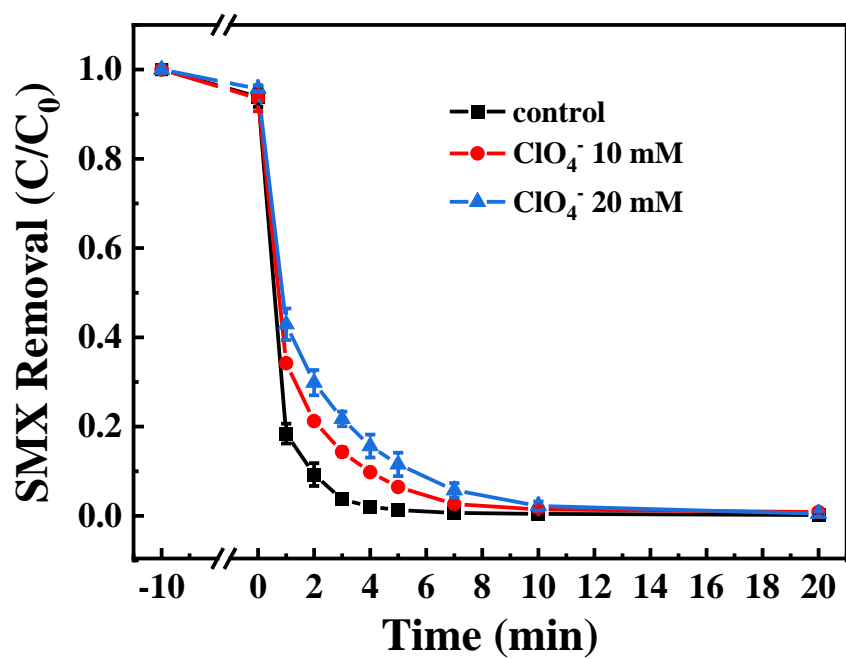

**Supplementary Fig. 20** | Effect of ionic strength on SMX removal in Fe-SAC-41.31/PMS system.

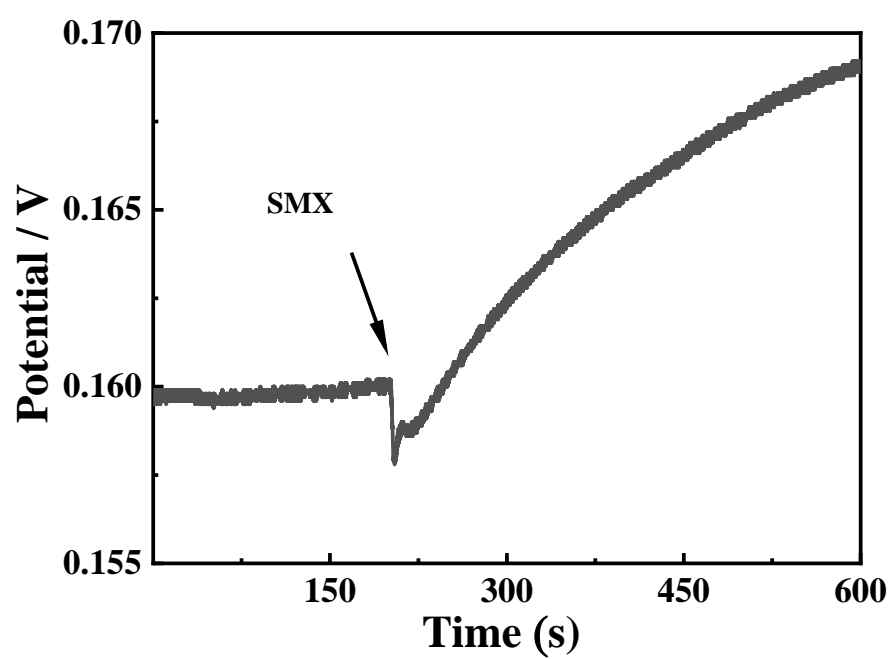

**Supplementary Fig. 21** | Open-circuit potential change of Fe-SAC-41.31 with the addition of SMX.

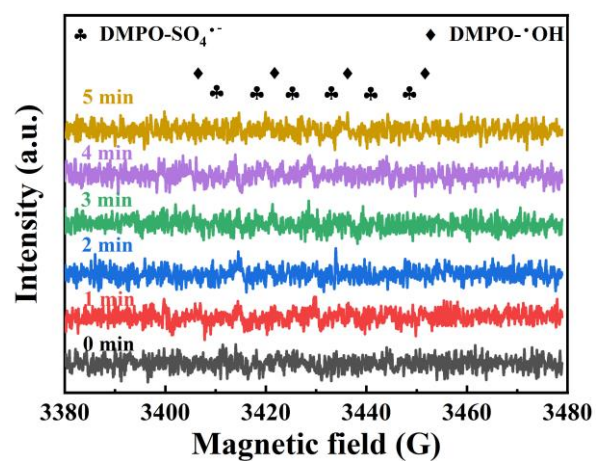

**Supplementary Fig. 22** | EPR spectra of  $\bullet\text{OH}$  or  $\text{SO}_4^{\bullet-}$  in the Fe-SAC-41.31/PMS system.

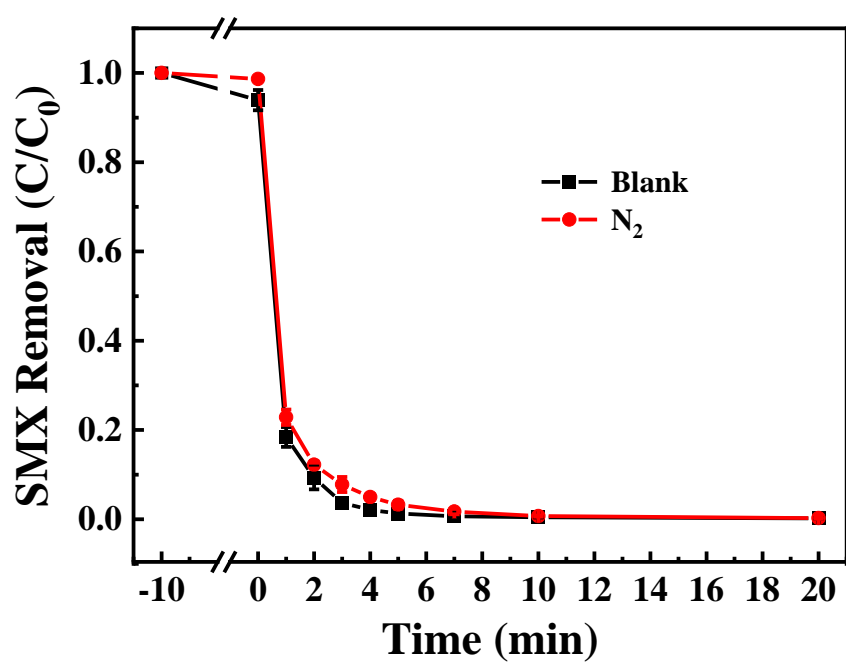

**Supplementary Fig. 23** | Degradation performance of SMX with continuous injection of N<sub>2</sub> into the Fe-SAC-41.31/PMS system at a rate of 40 mL min<sup>-1</sup>.

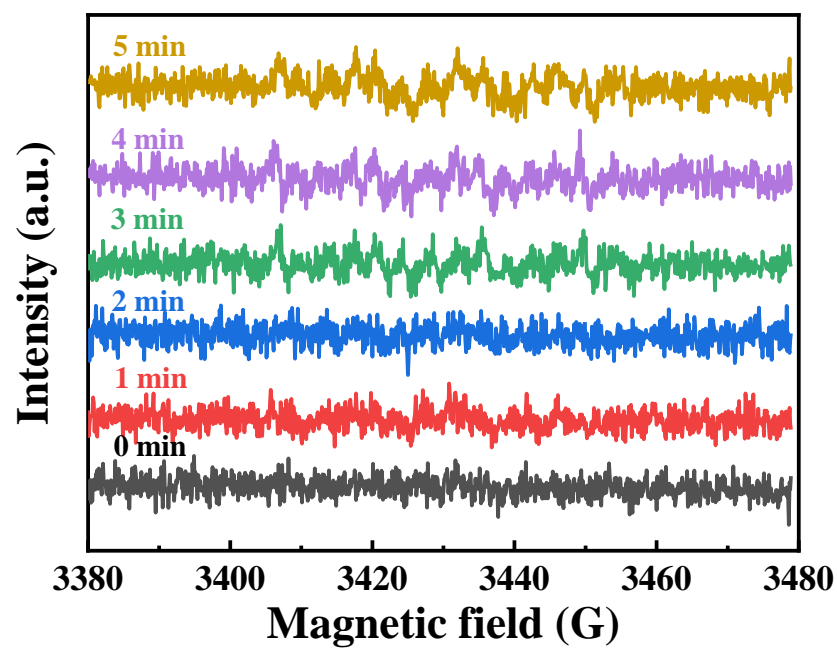

**Supplementary Fig. 24** | EPR spectra of  $\text{O}_2^{\bullet -}$  in the Fe-SAC-41.31/PMS system.



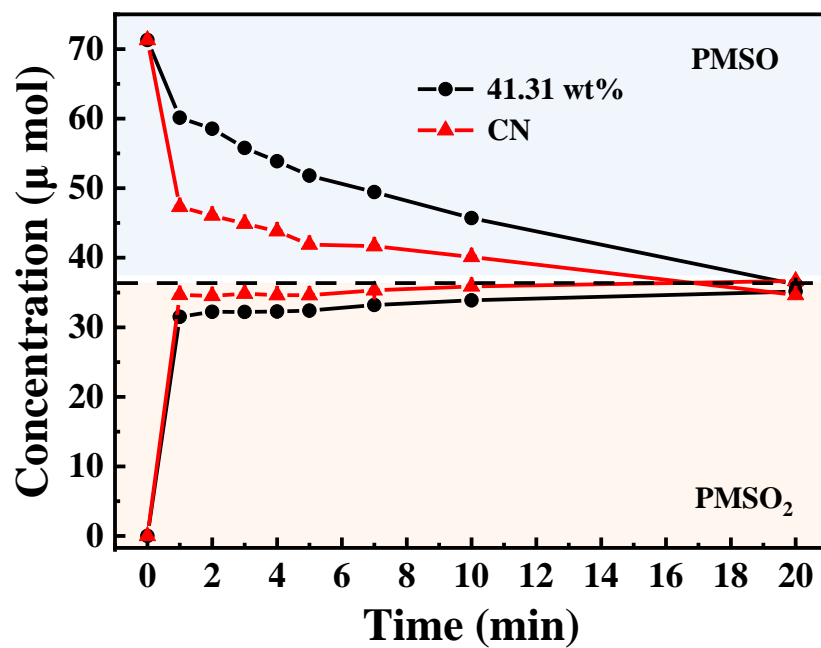

**Supplementary Fig. 25** | Concentration changes of PMSO and PMSO<sub>2</sub> over reaction time. Reaction conditions:  $[\text{PMSO}]_0 = 10 \text{ mg L}^{-1}$ ,  $[\text{PMS}] = 2.0 \text{ mM}$ .

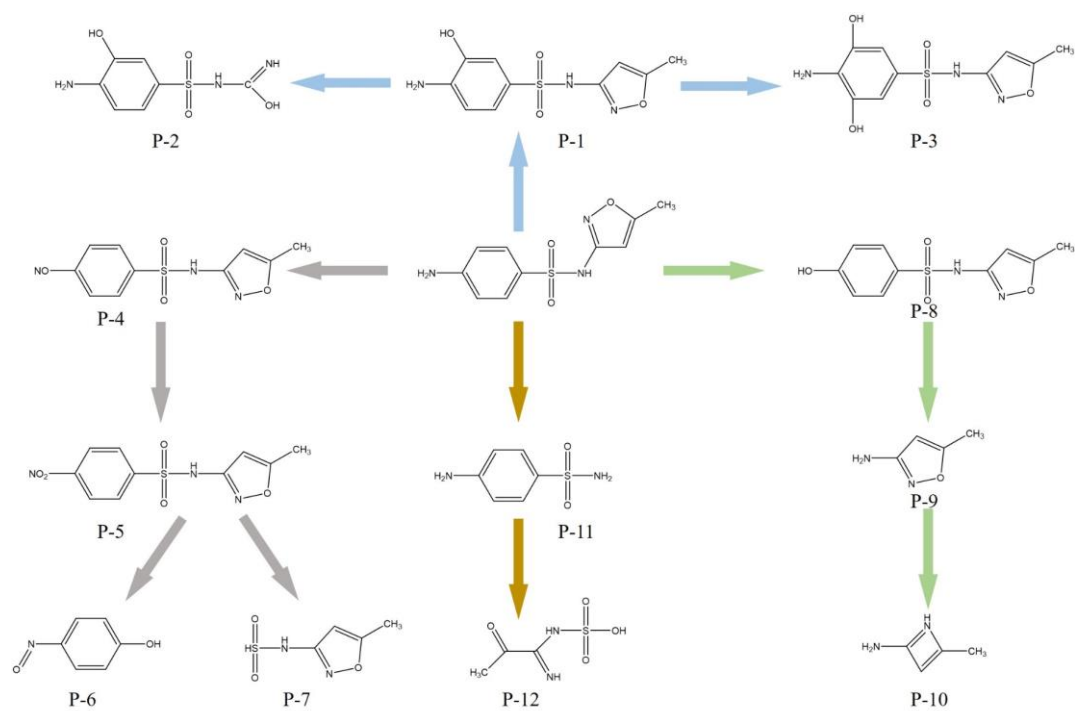

**Supplementary Fig. 26 |** SMX degradation pathways in the Fe-SAC-41.31/PMS system.

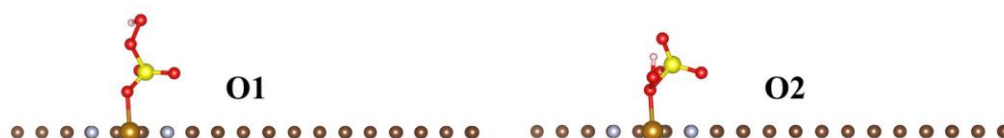

**Supplementary Fig. 27** | Two possible oxygen adsorption configurations of Fe-C<sub>2</sub>N<sub>2</sub> for PMS.

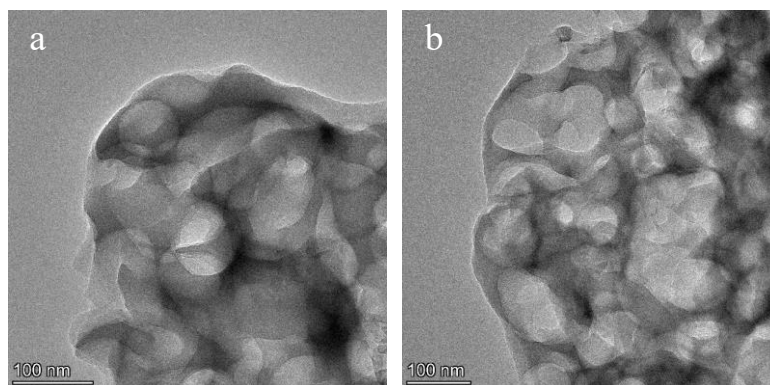

**Supplementary Fig. 28 | a, b,** TEM image of Fe-SAC-41.31 before and after the catalytic reaction.

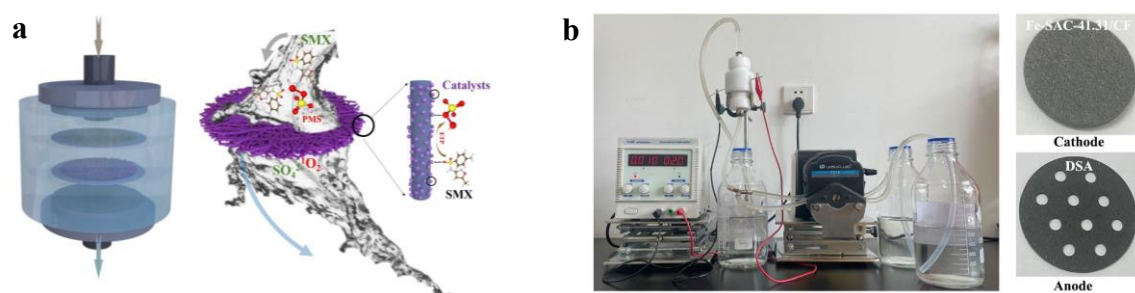

**Supplementary Fig. 29** | **a**, Design principle of continuous flow device; **b**, Physical diagram of continuous flow device.

### 3. Supplementary Tables 1-32

**Supplementary Table 1** | Fe content in varying samples.

| Sample       | Fe contents (wt%) |
|--------------|-------------------|
| CN           | 0                 |
| Fe-SAC-T     | 1.61              |
| Fe-SAC-5.16  | 5.16              |
| Fe-SAC-15.82 | 15.82             |
| Fe-SAC-24.62 | 24.62             |
| Fe-SAC-41.31 | 41.31             |
| Mn-SAC       | 35.13             |
| Ag-SAC       | 27.04             |
| La-SAC       | 22.62             |

**Supplementary Table 2** | BET surface area, pore diameter and mesoporous pore volume of as-prepared catalysts.

| Sample           | BET surface<br>(m <sup>2</sup> /g) | Pore diameter<br>(nm) | Mesoporous pore<br>volume<br>(cm <sup>3</sup> /g) |
|------------------|------------------------------------|-----------------------|---------------------------------------------------|
| NC               | 100.05                             | 21.89                 | 0.464                                             |
| Fe-SAC 5.16 wt%  | 84.06                              | 27.29                 | 0.344                                             |
| Fe-SAC 15.82 wt% | 57.55                              | 25.36                 | 0.321                                             |
| Fe-SAC 24.62 wt% | 55.44                              | 20.91                 | 0.181                                             |
| Fe-SAC 41.31 wt% | 46.10                              | 24.06                 | 0.176                                             |

**Supplementary Table 3 |** EXAFS fitting parameters for various Fe-SAC-x samples.

| Sample       | Shell | $N^a$ | $R(\text{\AA})^b$ | $\sigma^2(\text{\AA}^2)^c$ | $\Delta E_0(\text{eV})^d$ | $R$ factor |
|--------------|-------|-------|-------------------|----------------------------|---------------------------|------------|
| FePC         | Fe-N  | 4     | 1.96              | 0.0068                     | 1.9                       | 0.0124     |
| Fe-SAC-5.16  | Fe-N  | 3.7   | 2.09              | 0.0132                     | 4.91                      | 0.0226     |
| Fe-SAC-15.82 | Fe-N  | 4.4   | 2.04              | 0.0171                     | 3.4                       | 0.0188     |
| Fe-SAC-24.62 | Fe-N  | 4.2   | 2.04              | 0.0195                     | 5.15                      | 0.0199     |
| Fe-SAC-41.31 | Fe-N  | 4.1   | 2.04              | 0.0196                     | 4.44                      | 0.0151     |

$N^a$ : coordination numbers;  $R(\text{\AA})^b$ : bond distance;  $\sigma^2(\text{\AA}^2)^c$ : Debye-Waller factors;  $\Delta E_0(\text{eV})^d$ : the inner potential correction.  $R$  factor: goodness of fit.  $S_0^2$  was set to 0.848, according to the experimental EXAFS fit of Fe foil by fixing CN as the known crystallographic value.



**Supplementary Table 4** | Element contents and Fe density derived from XPS results.

| Sample           | Contents (at %) |       |                      |      |
|------------------|-----------------|-------|----------------------|------|
|                  | C               | N     | O <sub>(total)</sub> | Fe   |
| NC               | 39.21           | 58.06 | 2.72                 | 0    |
| Fe-SAC 5.16 wt%  | 40.54           | 53.29 | 4.57                 | 1.6  |
| Fe-SAC 15.82 wt% | 39.7            | 44.99 | 10.91                | 4.4  |
| Fe-SAC 24.62 wt% | 44.83           | 31.4  | 19.22                | 4.55 |
| Fe-SAC 41.31 wt% | 38.67           | 39.18 | 16.72                | 5.44 |

**Supplementary Table 5** | Catalytic oxidation performances of various catalysts for pollutants.

| Catalyst (g L <sup>-1</sup> )                           | Pollutant (mg L <sup>-1</sup> ) | ROS                                                                                                           | k value min <sup>-1</sup> | Reference     |
|---------------------------------------------------------|---------------------------------|---------------------------------------------------------------------------------------------------------------|---------------------------|---------------|
| High density Fe-SAC (0.1)                               | SMX (10)                        | ETP and <sup>1</sup> O <sub>2</sub>                                                                           | <b>1.06</b>               | This work     |
| Cu-Fe <sup>vac</sup> -LDH (0.1)                         | SMX (10)                        | Fe(IV)=O/Fe(V)=O                                                                                              | 0.13                      | <sup>4</sup>  |
| Fe@C-800 (0.4)                                          | SMX (10)                        | SO <sub>4</sub> <sup>•-</sup> , <sup>•</sup> OH, O <sub>2</sub> <sup>•-</sup> and <sup>1</sup> O <sub>2</sub> | 0.074                     | <sup>5</sup>  |
| Fe-NC-4 (0.15)                                          | SMX (5.0)                       | <sup>1</sup> O <sub>2</sub> and Fe(IV)=O                                                                      | 0.815                     | <sup>6</sup>  |
| CoSiO <sub>x</sub> (0.4)                                | SMX (7.6)                       | SO <sub>4</sub> <sup>•-</sup> and <sup>•</sup> OH                                                             | 0.47                      | <sup>7</sup>  |
| Fe-Co-O-g-C <sub>3</sub> N <sub>4</sub> (0.2)           | SMX (10)                        | SO <sub>4</sub> <sup>•-</sup> and <sup>1</sup> O <sub>2</sub>                                                 | 0.085                     | <sup>8</sup>  |
| High density Fe-SAC (0.1)                               | BPA (10)                        | ETP and <sup>1</sup> O <sub>2</sub>                                                                           | <b>1.269</b>              | This work     |
| Co-NC <sub>4</sub> (0.15)                               | BPA (10)                        | SO <sub>4</sub> <sup>•-</sup> , <sup>•</sup> OH and <sup>1</sup> O <sub>2</sub>                               | 0.69                      | <sup>9</sup>  |
| Fe-SAC (0.2)                                            | BPA (25)                        | <sup>1</sup> O <sub>2</sub>                                                                                   | 0.104                     | <sup>10</sup> |
| Co-SAC (0.2)                                            | BPA (25)                        | <sup>1</sup> O <sub>2</sub>                                                                                   | 0.083                     | <sup>10</sup> |
| CuO <sub>4</sub> N <sub>1</sub> (0.6)                   | BPA (20)                        | SO <sub>4</sub> <sup>•-</sup> , <sup>•</sup> OH, ETP and <sup>1</sup> O <sub>2</sub>                          | ~0.01                     | <sup>11</sup> |
| CuCoNi-NF                                               | BPA (10)                        | ETP                                                                                                           | 0.124                     | <sup>12</sup> |
| High density Fe-SAC (0.1)                               | BP (10)                         | ETP and <sup>1</sup> O <sub>2</sub>                                                                           | <b>1.084</b>              | This work     |
| ZnFe-LDH (0.2)                                          | BP (10)                         | Fe(IV)=O                                                                                                      | 0.1                       | <sup>13</sup> |
| CuO <sub>4</sub> N <sub>1</sub> (0.6)                   | BP (20)                         | SO <sub>4</sub> <sup>•-</sup> , <sup>•</sup> OH, ETP and <sup>1</sup> O <sub>2</sub>                          | ~0.025                    | <sup>11</sup> |
| FeN <sub>x</sub> -C (0.2)                               | BP (10)                         | SO <sub>4</sub> <sup>•-</sup> , <sup>1</sup> O <sub>2</sub> and Fe(V)=O                                       | 0.013                     | <sup>14</sup> |
| High density Fe-SAC (0.1)                               | TC (20)                         | ETP and <sup>1</sup> O <sub>2</sub>                                                                           | <b>1.575</b>              | This work     |
| xCCH/CN-Vn (0.04)                                       | TC (20)                         | Co(IV)=O and <sup>1</sup> O <sub>2</sub>                                                                      | 0.25                      | <sup>15</sup> |
| Co-N-GC (0.06)                                          | TC (50)                         | SO <sub>4</sub> <sup>•-</sup> , <sup>•</sup> OH and <sup>1</sup> O <sub>2</sub>                               | 0.04                      | <sup>16</sup> |
| Cu-In <sub>2</sub> O <sub>3</sub> /O <sub>v</sub> (0.5) | TC (20)                         | SO <sub>4</sub> <sup>•-</sup> and <sup>•</sup> OH                                                             | 0.26                      | <sup>17</sup> |
| CuO <sub>4</sub> N <sub>1</sub> (0.6)                   | TC (20)                         | SO <sub>4</sub> <sup>•-</sup> , <sup>•</sup> OH, ETP and <sup>1</sup> O <sub>2</sub>                          | ~0.3                      | <sup>11</sup> |
| High density Fe-SAC (0.1)                               | RhB (10)                        | ETP and <sup>1</sup> O <sub>2</sub>                                                                           | <b>0.987</b>              | This work     |
| g-C <sub>3</sub> N <sub>4</sub> @NPC (0.08)             | RhB (10)                        | SO <sub>4</sub> <sup>•-</sup> , <sup>•</sup> OH, O <sub>2</sub> <sup>•-</sup> and <sup>1</sup> O <sub>2</sub> | 0.152                     | <sup>18</sup> |
| High density Fe-SAC (0.1)                               | MO (10)                         | ETP and <sup>1</sup> O <sub>2</sub>                                                                           | <b>6.11</b>               | This work     |
| biochar                                                 | MO (10)                         | SO <sub>4</sub> <sup>•-</sup> and <sup>•</sup> OH                                                             | 0.127                     | <sup>19</sup> |

**Supplementary Table 6** | Intermediates detected by LC-MS in the Fe-SAC-41.31/PMS system.

| Product | m/z       | Molecular formula                                               | Proposed structure                                                                   |
|---------|-----------|-----------------------------------------------------------------|--------------------------------------------------------------------------------------|
| SMX     | 254.05938 | C <sub>10</sub> H <sub>11</sub> N <sub>3</sub> O <sub>3</sub> S | 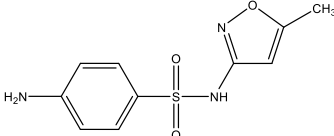   |
| P1      | 270.05430 | C <sub>10</sub> H <sub>11</sub> N <sub>3</sub> O <sub>4</sub> S |    |
| P2      | 232.03865 | C <sub>7</sub> H <sub>9</sub> O <sub>4</sub> N <sub>3</sub> S   |   |
| P3      | 286.04921 | C <sub>10</sub> H <sub>11</sub> O <sub>5</sub> N <sub>3</sub> S |  |
| P4      | 268.03865 | C <sub>10</sub> H <sub>9</sub> O <sub>4</sub> N <sub>3</sub> S  |  |
| P5      | 284.03356 | C <sub>10</sub> H <sub>9</sub> O <sub>5</sub> N <sub>3</sub> S  |  |
| P6      | 124.03930 | C <sub>6</sub> H <sub>5</sub> NO <sub>2</sub>                   |  |
| P7      | 163.01718 | C <sub>4</sub> H <sub>6</sub> O <sub>3</sub> N <sub>2</sub> S   |  |
| P8      | 255.04340 | C <sub>10</sub> H <sub>10</sub> O <sub>4</sub> N <sub>2</sub> S |  |

**P9** 99.05528  $\text{C}_4\text{H}_6\text{ON}_2$

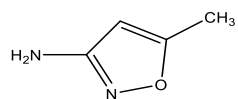

**P10** 83.06037  $\text{C}_4\text{H}_6\text{N}_2$

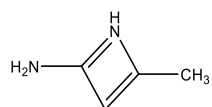

**P11** 173.03792  $\text{C}_6\text{H}_8\text{N}_2\text{O}_2\text{S}$

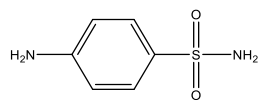

**P12** 167.01210  $\text{C}_3\text{H}_6\text{N}_2\text{O}_4\text{S}$

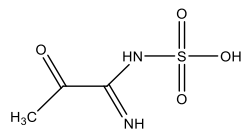

---

**Supplementary Table 7** | The adsorption energy and bond length of Fe-O, O-O and O-H in the possible two adsorption configurations.

| Adsorption site | $\Delta E_{\text{ads}}$ (eV) | Fe-O (Å) | O-O (Å) | O-H (Å) |
|-----------------|------------------------------|----------|---------|---------|
| O1              | -2.54                        | 1.971    | 1.463   | 0.986   |
| O2              | -2.53                        | 1.961    | 1.487   | 0.998   |

**Supplementary Table 8** | The Gibbs free-energy ( $\Delta E$ ) for every step in the two possible pathways of Fe-SAC-41.31 system.

| Path    | $\Delta E_{\text{ads}}$ (eV)     | $\Delta E_{\text{dis}}$ (eV)         | $\Delta E_{\text{des}}$ (eV)     | $\Delta E_{\text{dis}}$ (eV)     | $\Delta E_{\text{des}}$ (eV) | Total |
|---------|----------------------------------|--------------------------------------|----------------------------------|----------------------------------|------------------------------|-------|
| I       | (HSO <sub>5</sub> <sup>-</sup> ) | (*SO <sub>4</sub> <sup>-</sup> +*OH) | (*SO <sub>4</sub> <sup>-</sup> ) | (*O+*H)                          | (*O)                         | (eV)  |
|         | -1.53                            | 3.91                                 | 2.83                             | 0.53                             | 1.34                         | 7.08  |
| Path II | $\Delta E_{\text{ads}}$ (eV)     | $\Delta E_{\text{dis}}$ (eV)         | $\Delta E_{\text{des}}$ (eV)     | $\Delta E_{\text{des}}$ (eV)     | /                            | Total |
|         | (HSO <sub>5</sub> <sup>-</sup> ) | (*SO <sub>5</sub> <sup>-</sup> +*H)  | (*H)                             | (*SO <sub>5</sub> <sup>-</sup> ) |                              | (eV)  |
|         | -1.53                            | 3.54                                 | 2.86                             | 1.03                             |                              | 5.90  |

**Supplementary Table 9** | The Gibbs free-energy ( $\Delta E$ ) for every step in the possible pathway of different catalysts.

| Sample | $\Delta E_{\text{ads}}$ (eV)     | $\Delta E_{\text{dis}}$ (eV)        | $\Delta E_{\text{des}}$ (eV) | $\Delta E_{\text{des}}$ (eV)     | Total (eV) |
|--------|----------------------------------|-------------------------------------|------------------------------|----------------------------------|------------|
| (wt%)  | (HSO <sub>5</sub> <sup>-</sup> ) | (*SO <sub>5</sub> <sup>-</sup> +*H) | (*H)                         | (*SO <sub>5</sub> <sup>-</sup> ) |            |
| 5.16   | -2.04                            | 5.52                                | 1.11                         | 2.49                             | 7.08       |
| 15.82  | -1.99                            | 5.49                                | 1.17                         | 2.17                             | 6.84       |
| 24.62  | -1.38                            | 4.64                                | 1.19                         | 0.06                             | 4.51       |
| 41.31  | -1.53                            | 3.54                                | 2.86                         | 1.03                             | 5.90       |

**Supplementary Table 10 |** The quality parameters of the wastewater.

|                                                      | Tap water | Medical wastewater | Mati Lake |
|------------------------------------------------------|-----------|--------------------|-----------|
| pH                                                   | 7.5       | 7.53               | 8.02      |
| Conductivity ( $\mu\text{S cm}^{-1}$ )               | 330       | 21.70              | 1193      |
| COD ( $\text{mg L}^{-1}$ )                           | 3.0       | 145.0              | 32.6      |
| TOC ( $\text{mg L}^{-1}$ )                           | 1.56      | 102.5              | 31.7      |
| Cl <sup>-</sup> ( $\text{mg L}^{-1}$ )               | 2.11      | 502.1              | 420.6     |
| HCO <sub>3</sub> <sup>-</sup> ( $\text{mg L}^{-1}$ ) | 108       | 48.3               | 83.1      |
| NO <sub>3</sub> <sup>-</sup> ( $\text{mg L}^{-1}$ )  | 0.3       | 18.3               | 50.8      |



**Supplementary Table 11** | The quality parameters of the coal reverse osmosis water.

|                                                                    | Detection value |
|--------------------------------------------------------------------|-----------------|
| <b>pH</b>                                                          | 9.41            |
| <b>Conductivity (<math>\mu\text{S cm}^{-1}</math>)</b>             | 18400           |
| <b>TOC (<math>\text{mg L}^{-1}</math>)</b>                         | 69.725          |
| <b>TDS (<math>\text{mg L}^{-1}</math>)</b>                         | 9200            |
| <b>TN (<math>\text{mg L}^{-1}</math>)</b>                          | 194.75          |
| <b>Suspension (<math>\text{mg L}^{-1}</math>)</b>                  | 0.045           |
| <b>Saturation</b>                                                  | D=30, buff      |
| <b>UV254 (<math>\text{cm}^{-1}</math>)</b>                         | 0.675           |
| <b>Cl<sup>-</sup> (<math>\text{mg L}^{-1}</math>)</b>              | 4108.65         |
| <b>SO<sub>4</sub><sup>2-</sup> (<math>\text{mg L}^{-1}</math>)</b> | 604.223         |
| <b>NO<sub>3</sub><sup>-</sup> (<math>\text{mg L}^{-1}</math>)</b>  | 789.543         |
| <b>NO<sub>2</sub><sup>-</sup> (<math>\text{mg L}^{-1}</math>)</b>  | 2.828           |
| <b>NH<sub>4</sub><sup>+</sup></b>                                  | 8.31            |

**Supplementary Table 12 |** 3DEEM response and their associated characteristics.

| Region                | I                                                               | II                                                      | III                                                           | IV                                                     |
|-----------------------|-----------------------------------------------------------------|---------------------------------------------------------|---------------------------------------------------------------|--------------------------------------------------------|
| Excitation Wavelength | 200-250 nm                                                      | 200-250 nm                                              | 250-300 nm                                                    | 250-500 nm                                             |
| Emission Wavelength   | 280-380 nm                                                      | 380-600 nm                                              | 280-380 nm                                                    | 380-500 nm                                             |
| Characteristics       | Fluorophores associated with aromatic-like molecules (Tyrosine) | Fluorophores associated with fulvic acid-like molecules | Fluorophores associated with SMP-like molecules (Tryptophane) | Fluorophores associated with humic acid-like molecules |

**Supplementary Table 13** | The HPLC analysis conditions for different substrates.

| Substrates | Flow     | $\lambda$ | CH <sub>3</sub> OH | Acetonitrile | H <sub>2</sub> O                         |
|------------|----------|-----------|--------------------|--------------|------------------------------------------|
|            | (ml/min) | (nm)      | (%)                | (%)          | (%)                                      |
| <b>BPA</b> | 0.5      | 280       | 70                 | /            | 30                                       |
| <b>TC</b>  | 0.5      | 275       | /                  | 18           | 82(0.1% H <sub>3</sub> PO <sub>4</sub> ) |
| <b>SMX</b> | 0.5      | 265       | 35                 | /            | 65                                       |
| <b>SMT</b> | 0.5      | 280       | 35                 | /            | 65                                       |

#### 4. Supplementary References

- (1) Hohenberg, P.; Kohn, W. Inhomogeneous Electron Gas. *Physical Review* **1964**, *136* (3B), B864-B871.
- (2) Kohn, W.; Sham, L. J. Self-Consistent Equations Including Exchange and Correlation Effects. *Physical Review* **1965**, *140* (4A), A1133-A1138.
- (3) Perdew, J. P.; Burke, K.; Ernzerhof, M. Generalized gradient approximation made simple. *Physical Review Letters* **1996**, *77* (18), 3865.
- (4) Zhou, X.; Yin, R.; Kang, J.; Li, Z.; Pan, Y.; Bai, J.; Li, A. J.; Qiu, R. Atomic cation-vacancy modulated peroxymonosulfate nonradical oxidation of sulfamethoxazole via high-valent iron-oxo species. *Appl. Catal. B Environ.* **2023**, *330*, 122640.
- (5) Pu, M.; Wan, J.; Zhang, F.; Brusseau, M. L.; Ye, D.; Niu, J. Insight into degradation mechanism of sulfamethoxazole by metal-organic framework derived novel magnetic Fe@C composite activated persulfate. *J. Hazard. Mater.* **2021**, *414*, 125598.
- (6) Wang, J.; Li, B.; Li, Y.; Fan, X. B.; Zhang, F. B.; Zhang, G. L.; Peng, W. C. Facile synthesis of atomic Fe-N-C materials and dual roles investigation of Fe-N<sub>4</sub> sites in fenton-like reactions. *Adv. Sci.* **2021**, *8* (22), 2101824.
- (7) Liu, X.; Chen, C.; Chen, P.; Wang, L. Ultrafast degradation of SMX and TC by CoSiO<sub>x</sub> activated peroxymonosulfate: efficiency and mechanism. *RSC Adv.* **2023**, *13* (5), 3103-3111, 10.1039/D2RA06865F.
- (8) Wang, S. Z.; Liu, Y.; Wang, J. L. Peroxymonosulfate activation by Fe-Co-O-Co doped graphite carbon nitride for degradation of sulfamethoxazole. *Environ. Sci.*

*Technol.* **2020**, *54* (16), 10361-10369.

(9) Liang, X.; Wang, D.; Zhao, Z.; Li, T.; Gao, Y.; Hu, C. Coordination number dependent catalytic activity of single-atom cobalt catalysts for fenton-like reaction. *Adv. Funct. Mater.* **2022**, *32* (38), 2203001.

(10) Gao, Y.; Wu, T.; Yang, C.; Ma, C.; Zhao, Z.; Wu, Z.; Cao, S.; Geng, W.; Wang, Y.; Yao, Y.; et al. Activity trends and mechanisms in peroxymonosulfate-assisted catalytic production of singlet oxygen over atomic Metal-N-C catalysts. *Angew. Chem. Int. Ed.* **2021**, *60* (41), 22513-22521.

(11) Mi, X.; Zhong, H.; Zhang, H.; Xu, S.; Li, Y.; Wang, H.; Zhan, S.; Crittenden, J. C. Facilitating redox cycles of copper species by pollutants in peroxymonosulfate activation. *Environ. Sci. Technol.* **2022**, *56* (4), 2637-2646.

(12) Wang, M. M.; Liu, L. J.; Wen, J. T.; Ding, Y.; Xi, J. R.; Li, J. C.; Lu, F. Z.; Wang, W. K.; Xu, J. Multimetallic CuCoNi oxide nanowires in situ grown on a nickel foam substrate catalyze persulfate activation via mediating electron transfer. *Environ. Sci. Technol.* **2022**, *56* (17), 12613-12624.

(13) Bao, Y.; Lian, C.; Huang, K.; Yu, H.; Liu, W.; Zhang, J.; Xing, M. Generating High-valent Iron-oxo  $\equiv\text{Fe}^{\text{IV}}=\text{O}$  Complexes in Neutral Microenvironments through Peroxymonosulfate Activation by Zn-Fe Layered Double Hydroxides. *Angew. Chem. Int. Ed.* **2022**, *61* (42), e202209542.

(14) Zhang, B.; Li, X.; Akiyama, K.; Bingham, P. A.; Kubuki, S. Elucidating the mechanistic origin of a spin state-dependent  $\text{FeN}_x\text{-C}$  catalyst toward organic contaminant oxidation via peroxymonosulfate activation. *Environ. Sci. Technol.* **2022**,

56 (2), 1321-1330.

(15) Jiang, J.; Zhao, Z.; Gao, J.; Li, T.; Li, M.; Zhou, D.; Dong, S. Nitrogen vacancy-modulated peroxymonosulfate nonradical activation for organic contaminant removal via high-valent cobalt-oxo species. *Environ. Sci. Technol.* **2022**, 56 (9), 5611-5619.

(16) Ma, S.; Yang, D.; Guan, Y.; Yang, Y.; Zhu, Y.; Zhang, Y.; Wu, J.; Sheng, L.; Liu, L.; Yao, T. Maximally exploiting active sites on Yolk@shell nanoreactor: Nearly 100% PMS activation efficiency and outstanding performance over full pH range in Fenton-like reaction. *Appl. Catal. B Environ.* **2022**, 316, 121594.

(17) Zhao, Z.; Wang, P.; Song, C.; Zhang, T.; Zhan, S.; Li, Y. Enhanced interfacial electron transfer by asymmetric Cu-O<sub>v</sub>-In sites on In<sub>2</sub>O<sub>3</sub> for efficient peroxymonosulfate activation. *Angew. Chem. Int. Ed.* **2023**, 62 (11), e202216403.

(18) Kong, L.-H.; Wu, Y.; Shen, R.-F.; Zhang, W.-J.; Dong, Z.-Y.; Ge, W.-T.; Guo, X.-J.; Yan, X.; Chen, Y.; Lang, W.-Z. Combination of N-doped porous carbon and g-C<sub>3</sub>N<sub>4</sub> for effective removal of organic pollutants via activated peroxymonosulfate. *J. Environ. Chem. Eng.* **2022**, 10 (3), 107808.

(19) Mian, M. M.; Liu, G. Activation of peroxymonosulfate by chemically modified sludge biochar for the removal of organic pollutants: Understanding the role of active sites and mechanism. *Chem. Eng. J.* **2020**, 392, 123681.
